# Supplementary material
Source: MDPI journal article supplement (https://www.mdpi.com/2073-4468/2/1/152)

# Supplementary Materials

**Supplemental Figure 1.** Amino acid sequence of sdAb families for each target antigen.

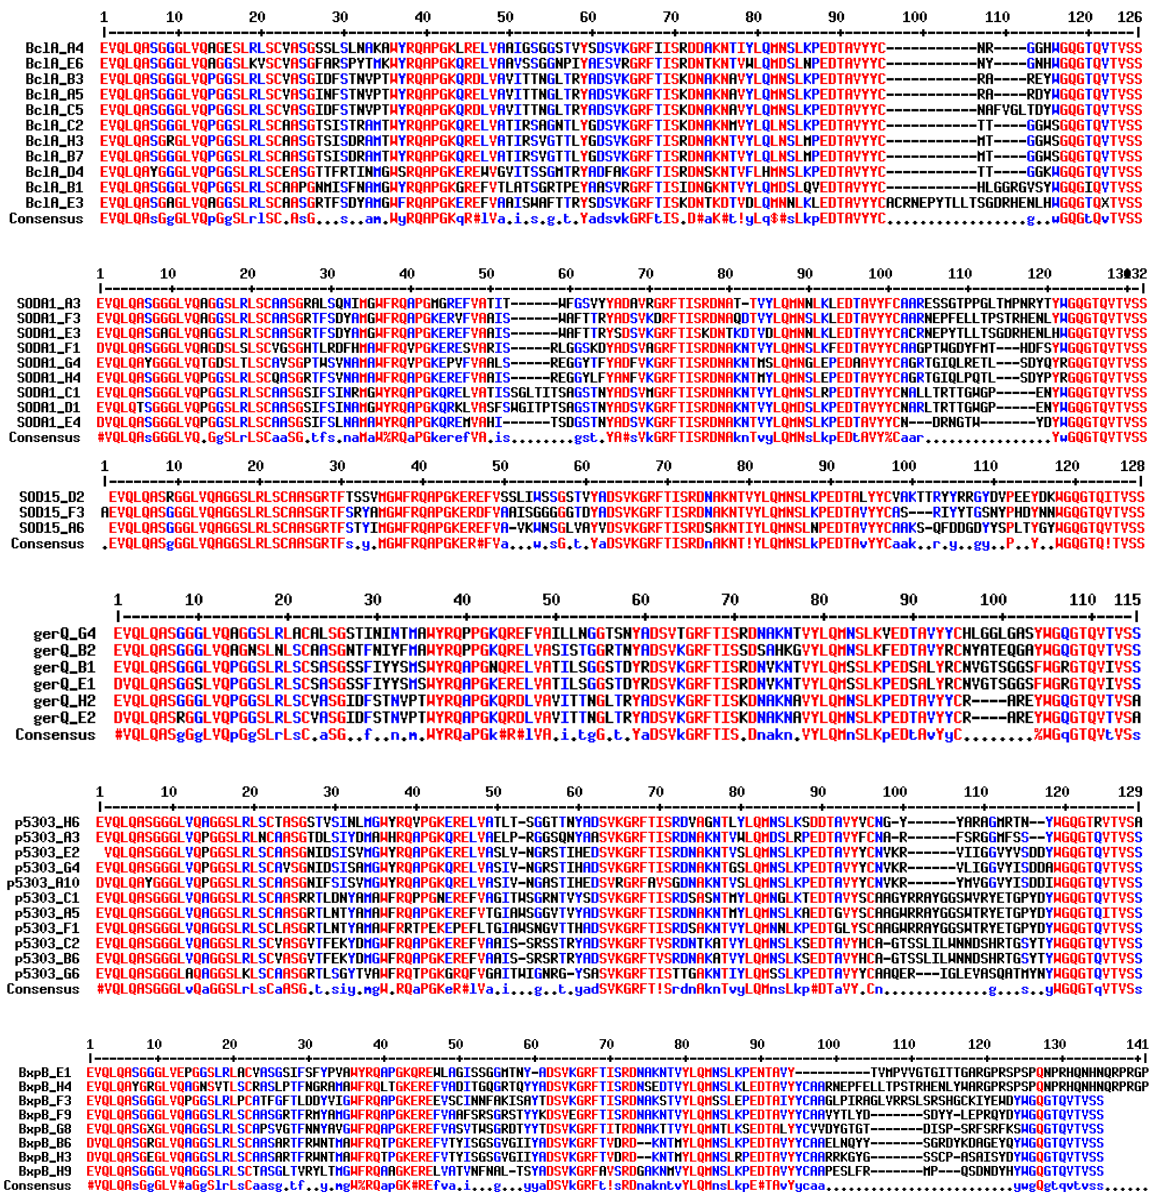

Alignments performed with Multalin (F. CORPET, 1988, *Nucl. Acids Res.* 16 (22), 10881-10890).

**Supplemental Figure 2.** Refolding of sdAbs assessed by circular dichroism.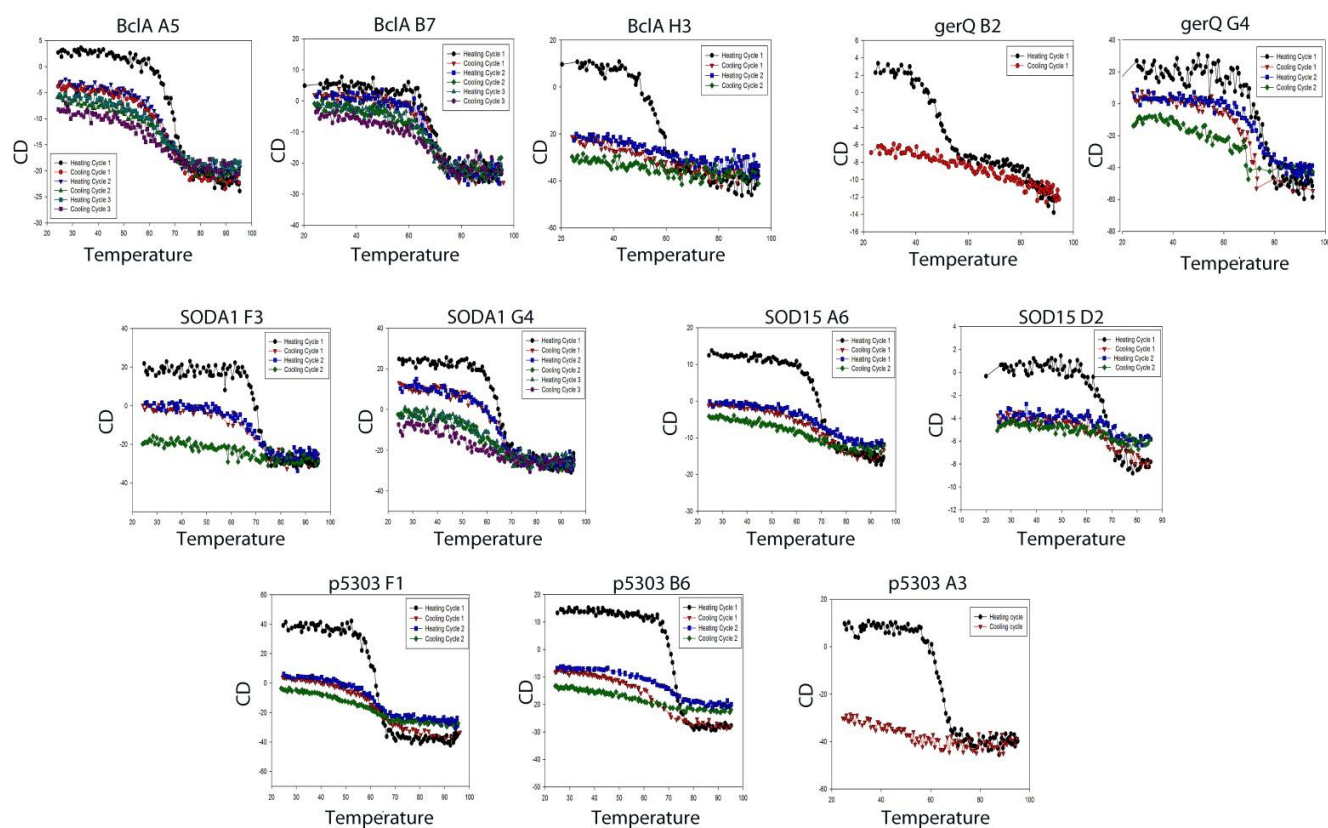

Supplemental Figure 3. Target specificity of BclA binding sdAbs.

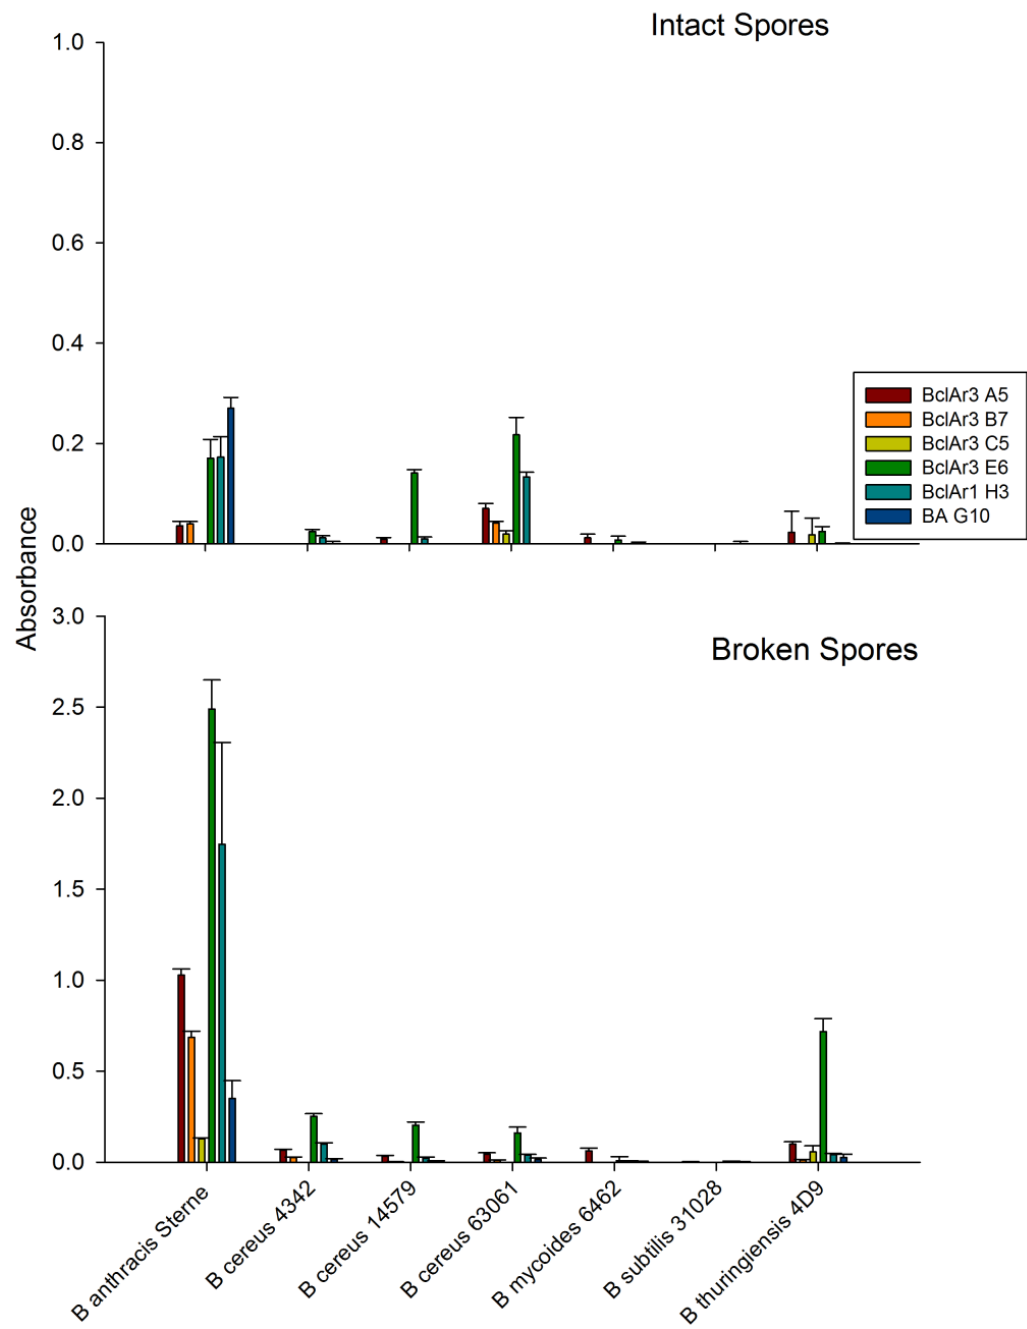

**Supplemental Figure 4.** Cross-reactivity of sdAbs for other recombinant spore proteins as assessed using MAPGPIX bead-based assays.

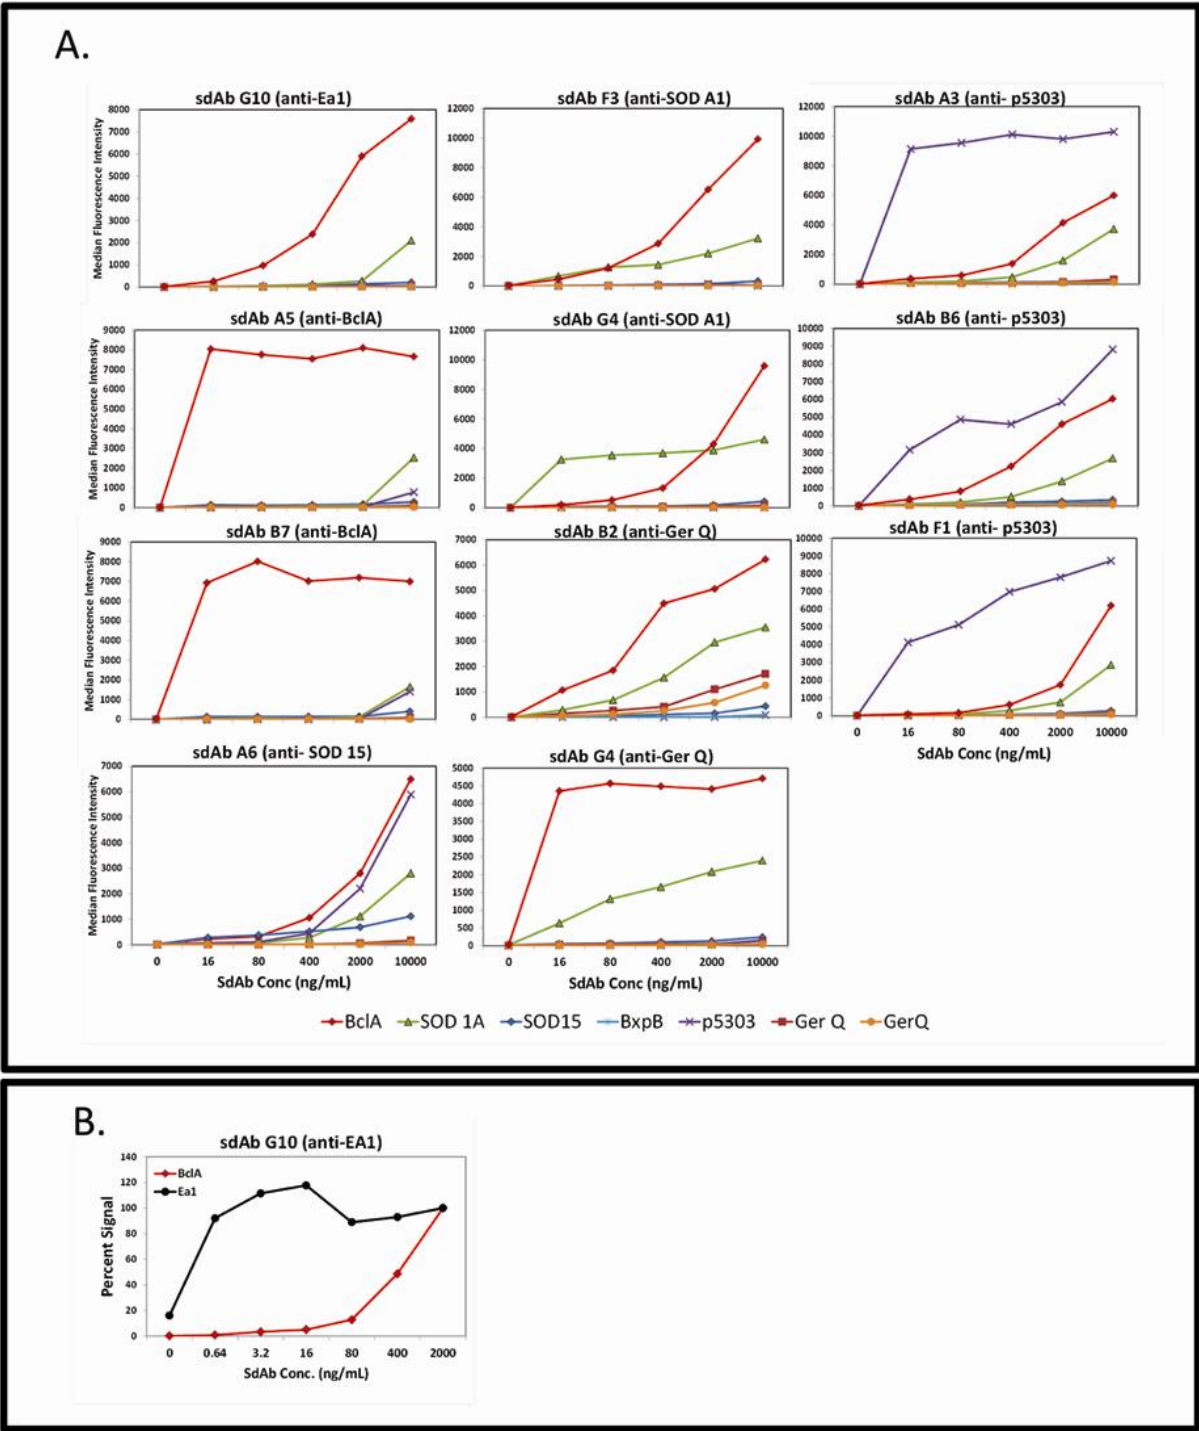

**Supplemental Figure 5.** Bead-based limit of detection assays for each of the sdAbs detailed in this manuscript.

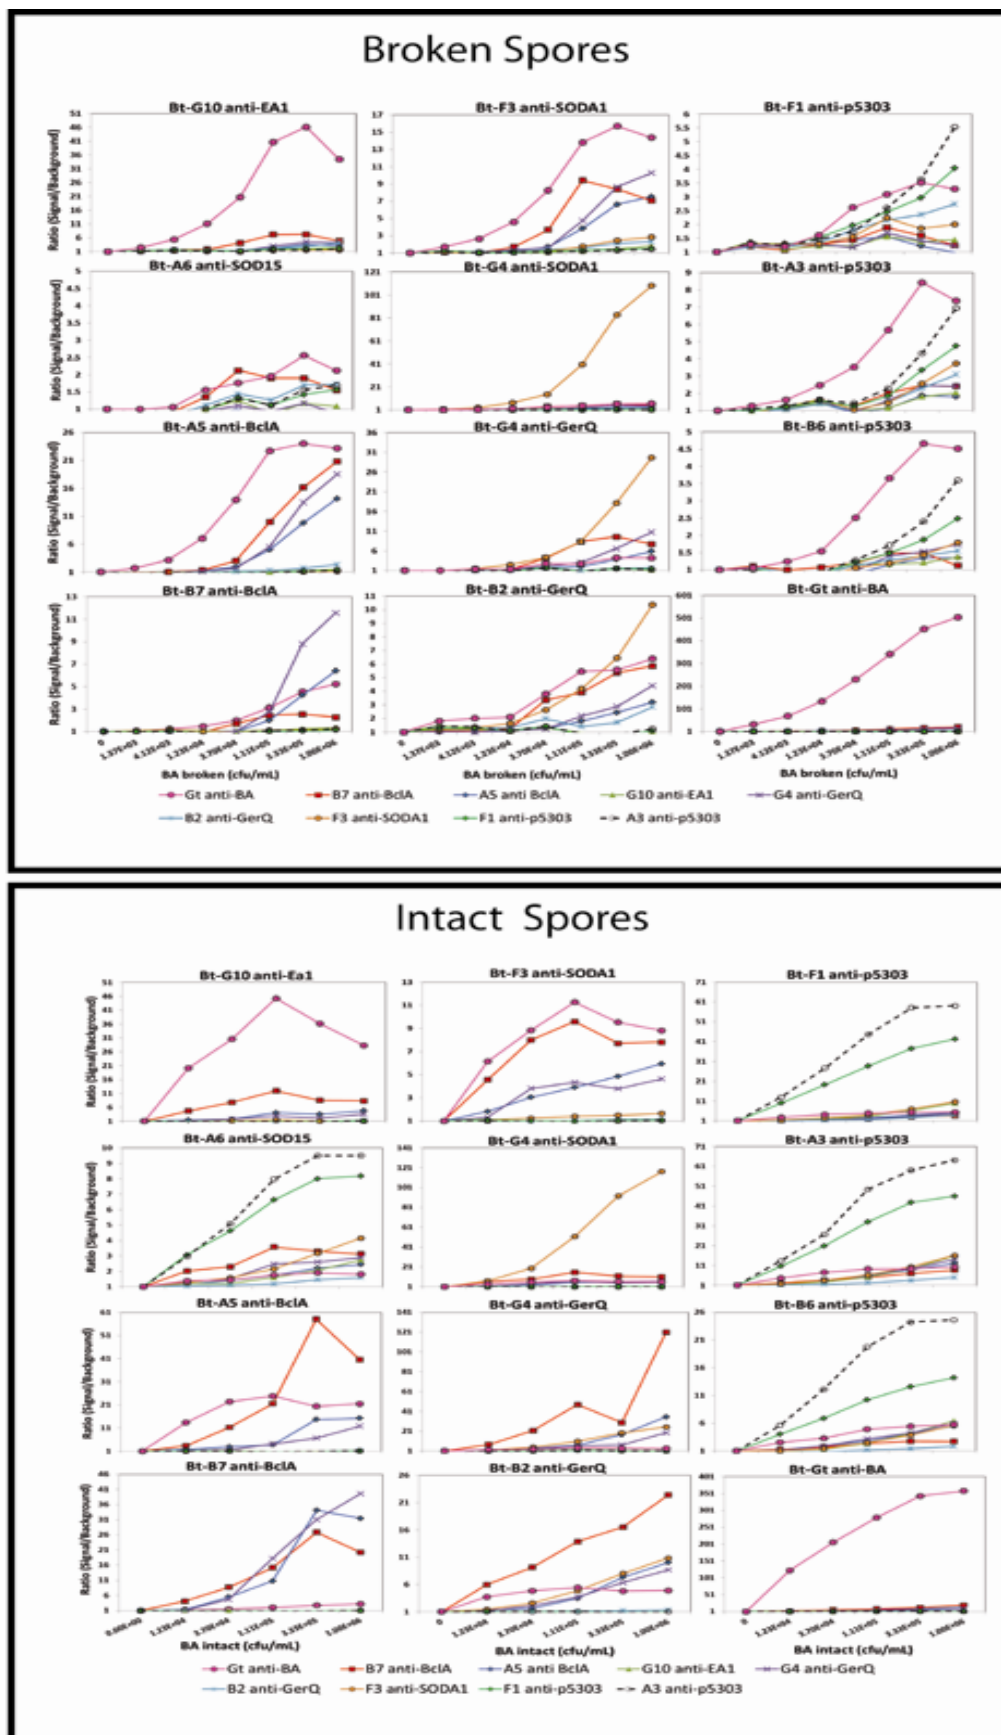

Supplement: s1 [file s1]
